# Supplementary material for: Chemical simulation of high-performance CaO/La2O3 catalysts on its anti-leaching property during biodiesel production
Source: Royal Society of Chemistry journal article supplement (doi:10.1039/d5nj01085c), 2025-01-01
Supplement: d5nj01085c1.pdf [file d5nj01085c1.pdf]

## ***Supplementary information***

### **Chemical simulation of high-performance CaO/La<sub>2</sub>O<sub>3</sub> catalysts on its anti-leaching property during biodiesel production**

Junying Fu<sup>1,2,3,4</sup>, Gaixiu Yang<sup>1,3,4</sup>, Min Lu<sup>1,3,4</sup>, Kejing Fang<sup>1,3,4</sup>, Pengmei Lv<sup>1,3,4,\*</sup>, Zuhong Xiong<sup>1,3,4,\*\*</sup>

<sup>1</sup> Guangzhou Institute of Energy Conversion, Chinese Academy of Sciences, 510640 Guangzhou, China P.R.

<sup>2</sup> University of Chinese Academy of Sciences, 101408 Beijing, China P.R.

<sup>3</sup> CAS Key Laboratory of Renewable Energy, 510640 Guangzhou, China P.R.

<sup>4</sup> Guangdong Provincial Key Laboratory of Renewable Energy, 510640 Guangzhou, China P.R.

Corresponding authors:

\*Pengmei Lv, lvpm@ms.giec.ac.cn

\*\*Zuhong Xiong, xiongzhang@ms.giec.ac.cn

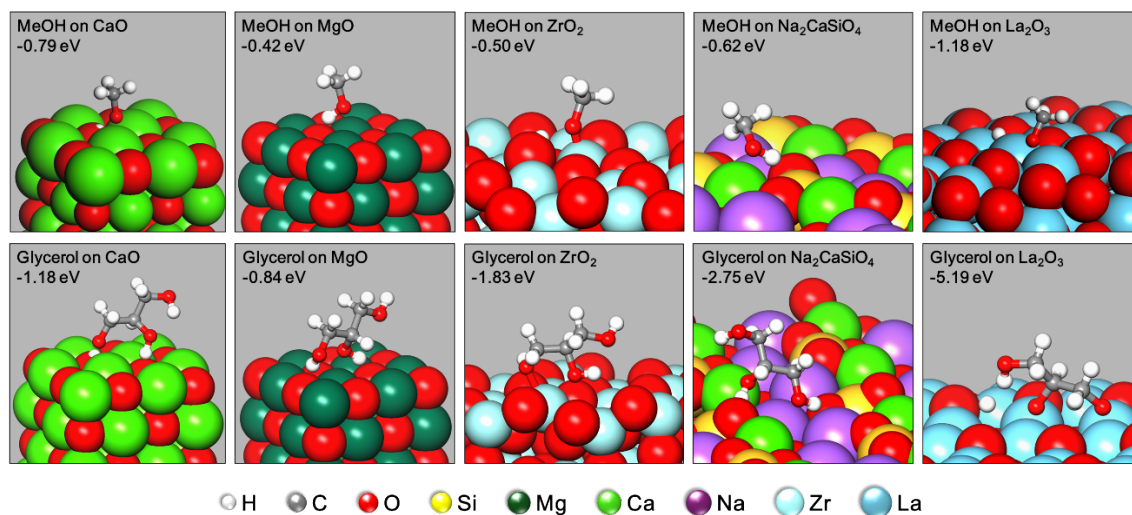

**Figure S1.** Adsorption behaviour of methanol and glycerol on CaO, MgO,  $m\text{-ZrO}_2$ ,  $\text{Na}_2\text{CaSiO}_4$ , and  $h\text{-La}_2\text{O}_3$ .

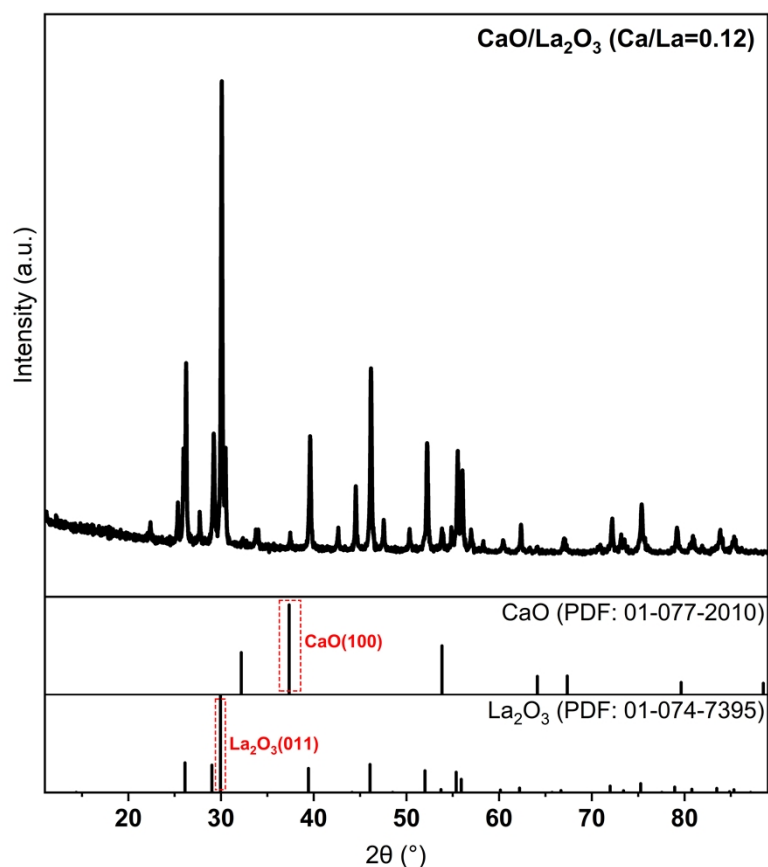

**Figure S2.** XRD spectrum of  $\text{CaO/La}_2\text{O}_3$  (Ca/La=0.12) catalyst

The crystalline phases of the catalyst samples were analysed by X-ray diffraction (XRD, X'Pert Pro MPD, PANalytical, Netherlands) with  $\text{Cu K}\alpha$  radiation at 40 kV and 40 mA. Diffraction patterns were recorded over a  $2\theta$  range of  $10^\circ$ – $90^\circ$  with a step size of  $0.0167^\circ$ . As the spectrum shows, the catalyst is mainly composed of CaO and  $\text{La}_2\text{O}_3$  phases, dominated by  $\text{CaO}(100)$  and  $\text{La}_2\text{O}_3(011)$ , respectively.
